# Supplementary material for: A novel pyroptosis-related gene signature to predict outcomes in laryngeal squamous cell carcinoma
Source: Aging (Albany NY). 2021 Dec 15;13(24):25960–79. doi: 10.18632/aging.203783 (PMC8751611; doi:10.18632/aging.203783)
Supplement: Supplementary Table 1 [file aging-13-203783-s002.pdf]

## SUPPLEMENTARY TABLE

**Supplementary Table 1. 47 pyroptosis-related genes.**

| Genes  | Full-names                                             |
|--------|--------------------------------------------------------|
| CASP1  | cysteine-aspartic acid protease-1                      |
| CASP3  | cysteine-aspartic acid protease-3                      |
| CASP4  | cysteine-aspartic acid protease-4                      |
| CASP5  | cysteine-aspartic acid protease-5                      |
| CASP6  | cysteine-aspartic acid protease-6                      |
| CASP7  | cysteine-aspartic acid protease-7                      |
| CASP8  | cysteine-aspartic acid protease-8                      |
| CASP9  | cysteine-aspartic acid protease-9                      |
| GSDMA  | gasdermin A                                            |
| GSDMB  | gasdermin B                                            |
| GSDMC  | gasdermin C                                            |
| GSDMD  | gasdermin D                                            |
| GSDME  | gasdermin E                                            |
| PJVK   | pejvakin/deafness, autosomal recessive 59              |
| NLRC4  | NLR family CARD domain containing 4                    |
| NLRP1  | NLR family pyrin domain containing 1                   |
| NLRP2  | NLR family pyrin domain containing 2                   |
| NLRP3  | NLR family pyrin domain containing 3                   |
| NLRP6  | NLR family pyrin domain containing 6                   |
| NLRP7  | NLR family pyrin domain containing 7                   |
| MEFV   | the pyrin inflammasome gene                            |
| AIM2   | Absent in melanoma 2                                   |
| NOD1   | nucleotide binding oligomerization domain containing 1 |
| NOD2   | nucleotide binding oligomerization domain containing 2 |
| CARD8  | a caspase recruitment domain                           |
| PYCARD | PYD and CARD domain containing                         |
| IL18   | interleukin 18                                         |
| IL1B   | interleukin 1 beta                                     |
| IL6    | interleukin 6                                          |
| PLCG1  | phospholipase C gamma 1                                |
| PRKACA | protein kinase cAMP-activated catalytic subunit alpha  |
| SCAF11 | SR-related CTD associated factor 11                    |
| TIRAP  | TIR domain containing adaptor protein                  |
| TNF    | tumor necrosis factor                                  |
| ELANE  | elastase, neutrophil expressed                         |
| GPX4   | glutathione peroxidase 4                               |
| ZBP1   | Z-DNA binding protein 1                                |
| GZMA   | GranzymeA                                              |
| GZMB   | GranzymeB                                              |
| TLR3   | Toll-like receptor 3                                   |
| TLR4   | Toll-like receptor 4                                   |
| RIPK1  | receptor interacting protein kinase 1                  |
| RIPK3  | receptor interacting protein kinase 3                  |
| IRF2   | interferon regulatory factor 2                         |
| IRF8   | interferon regulatory factor 8                         |
| NFKB1  | nuclear factor of $\kappa$ B                           |
| NEK7   | kinase NIMA-related kinase 7                           |
